---

1           **Transcriptome Variant Analysis of Noise Susceptibility in C57BL/6J Mice**

2  
3   **Authors:** Siyue Wang<sup>1a</sup>, Jing Cai<sup>1a</sup>, Ligang Kong<sup>a</sup>, Lei Xu<sup>a</sup>, Zhaoming Fan<sup>a</sup>, Haibo Wang<sup>\*a</sup>

4  
5   **Affiliation:** <sup>a</sup>Department of Otolaryngology-Head and Neck Surgery, Shandong Provincial  
6   ENT Hospital, Shandong University, No. 4, Duanxing West Road, Jinan, Shandong 250022,  
7   China

8  
9   **\*Corresponding author:** Haibo Wang,  
10   Department of Otolaryngology-Head and Neck Surgery,  
11   Shandong Provincial ENT Hospital, Shandong University,  
12   No. 4, Duanxing West Road, Jinan,  
13   Shandong 250022, China  
14   E-mail: whboto11@163.com

15  
16   <sup>1</sup>These authors contributed equally to this work.

17  
18   **Running head:** Noise Susceptibility in C57BL/6J Mice

19  
20   **Keywords:** noise, hearing loss, susceptibility, RNASeq

21

22

---

23 **Abstract**

24 **Background:** Susceptibility to noise varies dramatically between mice of the same genetic  
25 background; however, the underlying molecular mechanism remains unknown.

26 **Methods:** C57BL/6J (B6) mice of the same sex, age, and strain were exposed to noise of the  
27 same intensity and duration, and the auditory brainstem response (ABR) threshold was  
28 determined 48 h later. Some mice had significant hearing loss, while some did not; the ABR  
29 threshold measured in these two groups of mice was significantly different. The cochlea of  
30 the two groups of mice was dissected, and RNA sequencing and analysis were performed.  
31 Differentially expressed genes (DEGs) between the two groups were selected, Kyoto  
32 Encyclopedia of Genes and Genomes pathway analysis was performed, and protein–protein  
33 interaction network maps were listed.

34 **Results:** This study showed that noise exposure of the same intensity and duration caused  
35 different degrees of hearing loss in C57BL/6J (B6) mice. This was the result of the  
36 up-regulation or down-regulation of many genes, such as Nop2, Bysl, Rrp9, Spsb1, Fbxl20,  
37 and Fbxo31. Changes in the transcriptome of these genes may affect cochlear susceptibility to  
38 noise.

39 **Conclusion:** The DEGs identified in this experiment may provide more insight into protocols  
40 for gene therapy in the clinical practice of hearing loss.

41

42

43

44

45

## 46 **1. Introduction**

47 Noise-induced hearing loss is a form of sensorineural deafness that results from  
48 prolonged exposure to a noisy environment and a combination of factors. At present, the  
49 recognized mechanisms are mechanical damage to the cochlea, metabolic damage, immune  
50 and inflammatory damage, and genetics (Ding et al. 2019). Current studies have found that  
51 the genes involved in noise-induced hearing loss are associated with oxidative stress, DNA  
52 repair, gap junctions, apoptosis, K<sup>+</sup> recycling, and heat shock proteins (Ding et al. 2019; Mao  
53 and plasticity 2021; Sliwinska-Kowalska and research 2013). It is well known that  
54 susceptibility to noise varies significantly among individuals, and not everyone experiences  
55 the same hearing loss after the same noise exposure (Sliwinska-Kowalska and research  
56 2013).

57 Prior to this, some animal studies have demonstrated that NOX3, FOXO3, NRF2, CX26,  
58 CRFR2, BHMT, A1AR, and MYH14 (Beaulac et al. 2021; Fu et al. 2016; Graham et al. 2010;  
59 Honkura et al. 2016; Lavinsky et al. 2015; Partearroyo et al. 2019; Vlajkovic et al. 2017;  
60 Zhou et al. 2016) knockout mice are more sensitive to noise than wild-type mice. These  
61 studies in knockout mice have shown that genetic defects in mice, which disturb specific  
62 paths and structures within the cochlea, make mice more sensitive to noise (Le et al. 2017).  
63 There are also many other studies of genetic mouse noise susceptibility (Fairfield et al. 2005;  
64 Holme and JARO 2004; Kozel et al. 2002; Ohlemiller et al. 1999; Ohlemiller et al. 2000;  
65 Schick et al. 2004; Tabuchi et al. 2005; Yan et al. 2013), and it has been demonstrated that  
66 noise susceptibility varies for different strains of mice. For example, B6 and 129 mice

---

67 showed differences in gene expression after noise exposure; HSP70, HSP40, GADD45b, and  
68 P21Cip1 were significantly induced and up-regulated at the protein level in 129 mice, and  
69 their up-regulation may have a protective effect on hearing in these mice (Gratton et al. 2011).  
70 Inbred C57BL/6J (B6) mice are more likely to acquire noise-induced hearing loss than inbred  
71 CBA/Cal (CB) mice (oto-laryngologica 1992; Shone et al. 1991) because the AHL gene is  
72 reported to influence susceptibility to noise-induced hearing loss (Davis et al. 2001; Erway et  
73 al. 1996; Harding et al. 2005).

74 Many studies have shown that people working in environments with similar noise levels  
75 often show varying degrees of hearing loss (Henderson et al. 1993), especially in  
76 occupational noise exposure. The noise susceptibility of this population is more pronounced,  
77 with approximately 33% showing noise-induced hearing impairment and 16% showing  
78 substantial hearing impairment (Themann and America 2019). In China, the prevalence of  
79 occupational noise-induced hearing loss is 21.3% (Zhou et al. 2020); therefore, not all people  
80 exposed to noise suffer from noise-induced hearing loss. In addition, many studies have  
81 employed single nucleotide polymorphism screening methods in noise-exposed populations  
82 (Liu et al. 2021; Miao et al. 2019; Zhang et al. 2019b; Zhang et al. 2019c), demonstrating that  
83 genes play an important role in noise susceptibility.

84 We have also found that the same batch of mice showed different degrees of hearing loss  
85 under the same noise exposure. Some mice show severe deafness immediately after noise  
86 exposure, while some do not. However, there is no study on the transcriptome of mice of the  
87 same strain with different susceptibilities to noise. Therefore, we investigated the  
88 transcriptome variation of inbred C57BL/6J (B6) mice with different noise susceptibility.

---

89 RNASeq is the first sequencing-based method to detect the entire transcriptome in a  
90 high-throughput and quantitative manner, and it can accurately quantify the expression levels  
91 of genes (Marioni et al. 2008; Wang et al. 2009b). In recent years, the advent of RNASeq  
92 technology has allowed us to discover new genes and transcriptomes for a wide range of  
93 diseases, contributing to the discovery of disease-causing factors.

94 Therefore, we established a noise-induced hearing loss mouse model. After noise  
95 exposure, the degree of hearing loss was determined by auditory brainstem response (ABR)  
96 measurement, and some mice were selected as the noise-resistant group (R\_NE) and some as  
97 the noise-sensitive group (S\_NE). The mouse cochleae were collected, and using RNASeq  
98 technology, differentially expressed genes (DEGs) related to noise susceptibility were  
99 selected. The functions of these differential genes were summarized by Kyoto Encyclopedia  
100 of Genes and Genomes (KEGG) pathway analysis in order to determine their roles in the  
101 etiopathology of noise-induced hearing loss for future studies.

102

## 103 **2. Materials and Methods**

### 104 ***2.1. Mice***

105 Fifty inbred C57BL/6J (B6) male 8-week-old normal hearing mice (all purchased from  
106 Pengyue Company, Jinan, China) were selected and maintained in a quiet environment in the  
107 specific pathogen-free animal room of the Shandong Institute of Otolaryngology. All mice  
108 lived in a room with constant temperature (approximately 22–25°C) and were given adequate  
109 food and water. One week later, 40 mice were randomly selected as the experimental group  
110 and exposed to noise to establish the noise-induced hearing loss model, and 10 mice were

---

111 used as the control group without noise exposure (Control). According to the hearing results  
112 after noise exposure, we further subdivided the experimental group: those with a hearing  
113 threshold range above one standard deviation of the mean hearing threshold of the  
114 experimental group comprised the S\_NE, and those with a hearing threshold range below one  
115 standard deviation of the mean hearing threshold of the experimental group comprised the  
116 R\_NE.

117 All animal experiments were approved by the Ethics Committee of the Shandong  
118 Provincial ENT Hospital, Shandong University, and the experiments complied with the  
119 relevant ethical regulations for animal testing and research. All efforts were made to  
120 minimize the number of animals used and to prevent their suffering.

121

## 122 ***2.2. Noise exposure***

123 Mice were anesthetized intraperitoneally with a mixture of ketamine hydrochloride (100  
124 mg/kg) and xylazine (4 mg/kg) and then exposed to 100 dB sound pressure level (SPL) white  
125 noise for 2 h. The noise stimuli were synthesized by a noise generator (SF-06, Random Noise  
126 Generator, RION, USA) and amplified by an amplifier (CDi 1000 Power Amplifier, Crown,  
127 USA). The bottom of the cage and the center of the speaker were placed on the same  
128 horizontal line, and the distance between the two was determined using a noise meter. The  
129 noise meter radio was placed in the center of the bottom of the cage, and the noise measured  
130 in the center was ensured to be 100 dB each time.

131

## 132 ***2.3. ABR measurement***

---

133 All mice were tested for ABR thresholds prior to the experiment, and the experimental  
134 group underwent re-testing for ABR 48 h after noise exposure. The anesthesia employed was  
135 the same as above, and the anesthetized mice were placed in a sound-proof chamber to  
136 measure ABR responses under sound stimuli at 4, 8, 12, 16, 24, and 32 kHz, with 1024  
137 repetitions of stimulation per recording (Tucker-Davis Technology, USA). The left ear of the  
138 mouse was oriented towards the speaker (MF1; TDT) at a distance of approximately 5 cm,  
139 and the recording electrode was inserted into the subcutaneous tissue of the middle of the two  
140 ears, the reference electrode was fixed at the ipsilateral ear, and the ground electrode was  
141 placed at the back. The sound level was decreased by 5 dB from 90 dB until no hearing curve  
142 appeared. We ensured that each frequency was judged by the same person and that reliable  
143 results were obtained. It is also essential to duplicate this operation for low SPLs close to the  
144 threshold to guarantee the stability of the signal. After ABR audiometry, the mice were laid  
145 on a warming mat to maintain body temperature and ensure awakening.

146

#### 147 ***2.4. Sample collection and preparation***

148 ABR data were recorded for comparison, and the cochleae of mice in the R\_NE, the  
149 S\_NE, and the Control were collected. First, the mice were anesthetized with the same drug  
150 dose and methods, and cardiac perfusion was performed using normal saline. The left and  
151 right cochleae were removed and rapidly placed in RNA later (Invitrogen, AM7021)  
152 overnight at 4°C and transferred to -20°C for long-term storage. Total RNA was extracted and  
153 tested for quality. Polymerase chain reaction amplification was performed to complete the  
154 entire library preparation work.

---

155

## 156 **2.5. RNA sequencing**

157 Qualified libraries were sequenced with an Illumina NovaSeq6000 sequencer with a  
158 sequencing strategy of PE150 to obtain high-quality sequences (Clean Reads).

159

## 160 **2.6. DEG analysis**

161 DESeq2 (1.20.0, method = 'per-condition') was used for gene differential expression  
162 analysis. Differential gene screening primarily means the fold difference (fold change value)  
163 and q value (padj value, corrected P value) are related metrics. The criteria for differential  
164 gene screening in this experiment were more than 1.5-fold difference and  $q < 0.05$ .

165

## 166 **2.7. Protein–protein interaction network maps**

167 Using the STRING protein interaction database, combined with the results of DEG  
168 analysis and the interaction pairs included in the database, the DEG sets can be directly  
169 mapped to the protein–protein interaction (PPI) network of this species.

170

## 171 **2.8. KEGG pathway analysis**

172 KEGG is a record base for the systematized analysis of genome functions that link  
173 genomic and higher-order functional information. Pathway analysis was performed by  
174 applying a hypergeometric test to each pathway in KEGG to identify pathways that were  
175 evidently enriched in DEGs.

176



---

## 177 **3. Results**

### 178 ***3.1. Detection of ABR thresholds in mice before and after noise exposure***

179 To compare the differences in hearing of mice before and after noise exposure, we  
180 measured the ABR threshold of all mice before noise exposure, followed by noise exposure  
181 immediately after in the experimental group, and then measured the ABR threshold of noise  
182 in mice 48 h later; the data were then compared (Figure 1). According to the hearing results  
183 after noise exposure, we screened out the R\_NE and the S\_NE. The susceptibility of  
184 C57BL/6J (B6) mice to noise showed individual differences under the same noise exposure.

185

### 186 ***3.2. Gene expression in mouse cochleae with different susceptibility to noise***

187 C57BL/6J (B6) mice showed different hearing loss under the same noise exposure. To  
188 compare the differences in gene expression among the three groups (the R\_NE, the S\_NE,  
189 and the Control), we performed principal component analysis of RNASeq data, estimated the  
190 PC1 and PC2 values of each sample, and plotted the results (Figure 2). The gene expression  
191 analysis of the three groups cluster together and converge into three parts, indicating that  
192 there is a significant difference in gene expression between the R\_NE, the S\_NE, and the  
193 Control.

194 Differential analysis was performed between the three groups; the differential genes  
195 were plotted on a Wayne diagram (Figure 3). In total, there were 802 differential genes, 559  
196 up-regulated and 243 down-regulated, in the S\_NE compared to the Control. Further, there  
197 were 2646 differential genes, 1576 up-regulated and 1070 down-regulated, in the R\_NE  
198 compared to the Control. These three groups shared 529 common differential genes. These

---

199 529 differential genes were all noise-induced variants and were significant within the R\_SE  
200 and the S\_NE.

201 Next, we focused on the differential genes between the R\_NE and the S\_NE. A total of  
202 695 differential genes were obtained from these two groups by sequence analysis, with 366  
203 genes up-regulated and 329 genes down-regulated in the R\_NE compared to the S\_NE (Table  
204 S1). The 695 genes were plotted in a heat map showing the significant differences in Figure  
205 4.

206

### 207 **3.3. KEGG pathway analysis of DEGs**

208 The KEGG analysis of the 529 common differential genes in the three groups showed  
209 that the top 20 enriched pathways (Figure 5) suggested that these genes play an important  
210 role in focal adhesion, cytoskeleton, hormone synthesis, HIF-1, cellular matrix, viral infection,  
211 and Rap1. In addition, these pathways are significant in noise resistance and noise sensitivity,  
212 and it can be concluded that noise exposure leads to mutations in these 529 genes at the  
213 transcriptional level and is associated with the above pathways.

214 The KEGG analysis of 695 differential genes in the R\_NE and the S\_NE showed that  
215 these genes were significantly enriched in ribosome synthesis, apoptosis, NF- $\kappa$ B signaling  
216 pathway, nucleic acid metabolism, and insulin resistance pathways in eukaryotes. We believe  
217 that these pathways are significant in noise susceptibility and play a crucial part in the  
218 individual differences in hearing loss in mice after the same noise exposure.

219

### 220 **3.4. PPI network of DEG protein products in the R\_NE and S\_NE**

---

221 The 695 DEGs between the R\_NE and the S\_NE were constructed into a PPI network  
222 (Figure 7), indicating that the interactions of the proteins encoded by these genes are also  
223 closely complex, and the regulation of these genes may be controlled by interactions with  
224 other members. Analysis was performed using the MCODE plugin of Cytoscape, and the top  
225 two most significant subnetworks were selected from the resulting subnetworks (Figure 8).  
226 Blue represents that the expression level of this gene was down-regulated in the R\_NE, and  
227 red represents that the expression level of this gene was up-regulated in the S\_NE. The  
228 obtained genes in the subnetwork are ranked according to the magnitude of the P value; the  
229 smaller the P value, the more meaningful the gene in the R\_NE. Therefore, we focused on the  
230 top three down-regulated genes, Nop2, Bysl, and Rrp9, and the top three up-regulated genes,  
231 Spsb1, Fbxl20, and Fbxo31.

232

## 233 **4. Discussion**

### 234 ***4.1. Related DEGs for noise susceptibility***

235 In this experiment, mice with the same genetic background showed different hearing loss  
236 due to noise exposure. Their genes were analyzed for variation arising at the transcriptional  
237 level. We found that 695 genes were differentially expressed in the R\_NE and the S\_NE and  
238 constructed a PPI network map (Figure 7) to screen the top two subnetworks (Figure 8) that  
239 were related to noise susceptibility in mice. Nop2, Bysl, and Rrp9 were the down-regulated  
240 genes in the R\_NE, with P values in the top three in the subnetwork. Nop2 had the smallest P  
241 value among the selected subnetworks, illustrating that down-regulation of this gene was  
242 significantly associated with noise susceptibility. It has been demonstrated that the degree of

---

243 methylation of NOP2 is associated with the dedifferentiation potential of postmitotic  
244 supporting cells into otic stem cells. NOP2 may therefore play a role in regulating the  
245 stemness of the organ of Corti (Waldhaus et al. 2012). We have reason to believe that NOP2  
246 can affect cochlear susceptibility to noise; however, this needs to be confirmed in further  
247 studies. In addition, Bysl and Rrp9 are not currently being studied in the field of otology.  
248 However, some scholars have found that in liver cancer, loss of Bysl induces apoptosis (Wang  
249 et al. 2009a). Therefore, we have inferred from our experimental results that down-regulation  
250 of Bysl increases noise-induced apoptosis, resulting in cochlear sensitivity to noise; however,  
251 this requires further verification. Rrp9 is less well studied; it is a U3 snoRNA-binding protein  
252 consisting of a WD-repeat domain and an n-terminus region (Zhang et al. 2013). Rrp9 is  
253 important in the processing of pre-rRNA (Du et al. 2021), but we are currently unable to  
254 determine the effect of this gene on noise susceptibility.

255 Spsb1, Fbxl20, and Fbxo31 were up-regulated genes in the R\_NE, with P values in the  
256 top three in the subnetwork; hence, they are also significantly correlated with noise  
257 susceptibility. Several studies have shown that up-regulation of Spsb1, Fbxl20, and Fbxo31  
258 inhibits apoptosis in cancer (Feng et al. 2014; Kim et al. 2019; Liu et al. 2018; Manne et al.  
259 2021; Qin and discovery 2014); hence, it is speculated that high expression of these three  
260 genes may inhibit noise-induced apoptosis and thus resist noise. We aim to continue to  
261 investigate whether up- or down-regulation of these genes protects or impairs hearing in  
262 noisy environments in subsequent experiments.

263

264 ***4.2. Pathways involved in susceptibility to noise***

---

265 We further investigated the function of these differential genes. The common differential  
266 genes of the Control, the R\_NE, and the S\_NE were caused by noise exposure, and their  
267 pathways were associated with noise-induced hearing loss. In the present study, the pathways  
268 closely related to noise-induced hearing loss and of interest to us were the focal adhesion,  
269 regulation of actin cytoskeleton, and HIF-1 signaling pathways. The involvement of DEGs  
270 associated with noise-induced hearing loss in focal adhesion was mentioned in an article on  
271 proteomics (Miao et al. 2021). In another study, it was shown that noise can increase the  
272 expression of focal adhesion kinase, and in noise-exposed Corti organs, FAK p-Tyr577 can be  
273 detected in the outer hair cell stereocilia in noise-damaged areas (Jamesdaniel et al. 2011). A  
274 similar article also mentions focal adhesion, which highlights that nonerythroid spectrin alpha  
275 II plays a key role in the morphology and auditory function of hair cell stereocilia by  
276 modulating focal adhesion signaling (Yao et al. 2022). Stereocilia are actin-based protrusions  
277 on auditory and vestibular sensory cells that are necessary for hearing and balance. They are  
278 regulated by myosin motors, actin cross-linkers, and capping proteins (McGrath et al. 2017).  
279 Studies on the relationship between regulation of the actin cytoskeleton and noise-induced  
280 hearing loss are also ongoing. Previous reports have clearly described that F-actin cleavage  
281 occurs in the hair cells of guinea pigs and cochleae of dragon cats after noise exposure (Hu et  
282 al. 2002; Raphael and neurology 1992). Thus, it can be inferred that the signaling pathway of  
283 regulation of actin cytoskeleton should maintain the morphology of hair cells, and that noise  
284 will imbalance the pathway and lead to the degeneration of hair cells. If there are genes that  
285 can protect this pathway from noise-induced destruction, the hair cells can be protected,  
286 thereby protecting hearing.

---

287 In humans, hypoxia is an influential causative element of inner ear disease, and the role  
288 of HIF-1 in the regulation of oxygen homeostasis in the inner ear, such as regulation, energy  
289 supply, cell proliferation, or death is of interest. Insufficient blood supply after noise exposure  
290 leads to a decrease in the oxygen partial pressure, leaving the cochlea in a hypoxic state  
291 (pathology 2009). Hypoxic environmental preconditioning prevents noise-induced hearing  
292 loss in CBA/J and CBA/CAJ mice by upregulating HIF-1 $\alpha$  in the organ of Corti (Gagnon et  
293 al. 2007). Another study proposed the use of cobalt chloride treatment, which up-regulates  
294 HIF-1 $\alpha$  and protects hearing in noise-exposed mice (Chung et al. 2011). We suggest that the  
295 HIF-1 signaling pathway, which activates the transcription of diverse genes that enable cells  
296 to survive under hypoxic conditions, plays a crucial role in triggering protective metabolic  
297 changes in response to hypoxia (pathology 2009), resists noise, maintains cochlear  
298 homeostasis, and thus protects hearing.

299 The differential genes selected in the R\_NE and the S\_NE were due to different  
300 susceptibility of the mouse cochlea to noise; therefore, the enrichment pathways were  
301 associated with noise susceptibility. Among them, apoptosis and the NF- $\kappa$ B signaling  
302 pathway deserve our attention. Numerous studies have now demonstrated that cochlear hair  
303 cells can undergo apoptosis under noise exposure. Many drugs or methods have also been  
304 found to inhibit hair cell apoptosis to protect hearing. Therefore, we suggest that noise  
305 initiates the apoptosis pathway in hair cells, making the cochlea increasingly sensitive to  
306 noise.

307 While the NF- $\kappa$ B signaling pathway may be a defense pathway, it has been demonstrated  
308 that in the auditory system, the NF- $\kappa$ B signaling pathway can be activated by noise (Zhang et

---

309 al. 2019a) and can prevent noise-induced hearing loss (Tahera et al. 2006). Investigations on  
310 the use of photobiomodulation (PBM) for noise-induced hearing loss found that PBM can  
311 activate NF- $\kappa$ B to protect the cochlea from oxidative stress and apoptosis (Tamura et al.  
312 2016). In other studies, mice lacking the p50 subunit of NF- $\kappa$ B were found to have a higher  
313 sensitivity to noise exposure (Lang et al. 2006). Therefore, there is no doubt that the NF- $\kappa$ B  
314 signaling pathway can resist noise damage.

315 In this experiment, we found that ABR can be used to determine the presence of hearing  
316 loss. Otoacoustic emission can also be performed to detect cochlear amplification function  
317 and hair cell function integrity. In addition, there may have been asymmetric hearing loss, as  
318 we only tested the hearing threshold of one ear. Further experiments could be performed in  
319 the future to address these limitations.

320

## 321 **5. Conclusions**

322 This study revealed that mice with the same genetic background show different  
323 susceptibility to noise, and transcriptome specific changes were apparent after noise exposure.  
324 DEGs were found through variant analysis. Bioinformatic analysis revealed the functional  
325 implication of these genes. Changes in the transcriptome of these genes may affect cochlear  
326 susceptibility to noise. In the next step, the experimental results of this study should be  
327 verified using knockout mice. Noise-induced hearing loss is an irreversible disease; hence, its  
328 prevention is particularly important. Workers exposed to the same noise over the same  
329 occupational years experience varying degrees of noise-induced hearing loss. We can use  
330 gene therapy to prevent work-related injuries in these workers. As the society continues to

---

331 evolve, people are becoming more susceptible to noise, which in turn damages their hearing.  
332 This study can help with future genetic screening, predict individual susceptibility to noise,  
333 and prevent noise-induced hearing loss using gene therapy.

334

#### 335 **Data availability**

336 The authors affirm that all data necessary for confirming the conclusions of the article are  
337 present within the article, figures, and tables. Supplementary material has been uploaded to  
338 <https://gsajournals.figshare.com/>.

339

#### 340 **Acknowledgments**

341 Haibo Wang, Zhaoming Fan, Lei Xu, and Jing Cai designed and supervised the project. Siyue  
342 Wang and Jing Cai performed experiments and acquired the data. Jing Cai and Ligang Kong  
343 analyzed and interpreted the results. Siyue Wang and Jing Cai wrote the manuscript. Xiuyue  
344 Biol (Jinan, China) analyzed the results of RNA sequencing.

345

#### 346 **Funding**

347 This study was supported by the National Natural Science Foundation of China (No.  
348 82101226 and No. 81700918/H1304).

349

#### 350 **Conflict of Interest**

351 The authors declare no relevant conflict of interests.

352



---

## 353 References

- 354 Beulac HJ, Gilels F, Zhang J, Jeoung S, death PMWJC, disease. 2021. Primed to die: An investigation of the  
355 genetic mechanisms underlying noise-induced hearing loss and cochlear damage in homozygous  
356 foxo3-knockout mice. 12(7):682.
- 357 Chung JW, Shin J-E, Han KW, Ahn JH, Kim Y-J, Park J-W, toxicology H-SSJE, pharmacology. 2011. Up-regulation of  
358 hypoxia-inducible factor-1 alpha by cobalt chloride prevents hearing loss in noise-exposed mice.  
359 31(1):153-159.
- 360 Davis RR, Newlander JK, Ling X, Cortopassi GA, Krieg EF, research LCEJH. 2001. Genetic basis for susceptibility to  
361 noise-induced hearing loss in mice. 155(1-2):82-90.
- 362 Ding T, Yan A, medicine KLJBjoh. 2019. What is noise-induced hearing loss? 80(9):525-529.
- 363 Du M-G, Liu F, Chang Y, Tong S, Liu W, Chen Y-J, chemistry PXJTJob. 2021. Neddylation modification of the u3  
364 snorna-binding protein rrp9 by smurf1 promotes tumorigenesis. 297(5):101307.
- 365 Erway LC, Shiau YW, Davis RR, research EFKJH. 1996. Genetics of age-related hearing loss in mice. lii.  
366 Susceptibility of inbred and f1 hybrid strains to noise-induced hearing loss. 93(1-2):181-187.
- 367 Fairfield DA, Lomax MI, Dootz GA, Chen S, Galecki AT, Benjamin IJ, Dolan DF, research RAAJJon. 2005. Heat  
368 shock factor 1-deficient mice exhibit decreased recovery of hearing following noise overstimulation.  
369 81(4):589-596.
- 370 Feng Y, Pan T-C, Pant DK, Chakrabarti KR, Alvarez JV, Ruth JR, discovery LACJC. 2014. Spsb1 promotes breast  
371 cancer recurrence by potentiating c-met signaling. 4(7):790-803.
- 372 Fu X, Zhang L, Jin Y, Sun X, Zhang A, Wen Z, Zhou Y, Xia M, plasticity JGJN. 2016. Loss of myh14 increases  
373 susceptibility to noise-induced hearing loss in cba/caj mice. 2016:6720420.
- 374 Gagnon PM, Simmons DD, Bao J, Lei D, Ortmann AJ, research KKOJH. 2007. Temporal and genetic influences on  
375 protection against noise-induced hearing loss by hypoxic preconditioning in mice. 226(1-2):79-91.
- 376 Graham CE, Basappa J, disease DEVJNo. 2010. A corticotropin-releasing factor system expressed in the cochlea  
377 modulates hearing sensitivity and protects against noise-induced hearing loss. 38(2):246-258.
- 378 Gratton MA, Eleftheriadou A, Garcia J, Verduzco E, Martin GK, Lonsbury-Martin BL, research AEVJH. 2011.  
379 Noise-induced changes in gene expression in the cochleae of mice differing in their susceptibility to  
380 noise damage. 277(1-2):211-226.
- 381 Harding GW, Bohne BA, research JDVJH. 2005. The effect of an age-related hearing loss gene (ahl) on  
382 noise-induced hearing loss and cochlear damage from low-frequency noise. 204(1-2):90-100.
- 383 Henderson D, Subramaniam M, Ear FABJ, hearing. 1993. Individual susceptibility to noise-induced hearing loss:  
384 An old topic revisited. 14(3):152-168.
- 385 Holme RH, JARO KPSJJotAfRiO. 2004. Progressive hearing loss and increased susceptibility to noise-induced  
386 hearing loss in mice carrying a cdh23 but not a myo7a mutation. 5(1):66-79.
- 387 Honkura Y, Matsuo H, Murakami S, Sakiyama M, Mizutari K, Shiotani A, Yamamoto M, Morita I, Shinomiya N,  
388 Kawase T et al. 2016. Nrf2 is a key target for prevention of noise-induced hearing loss by reducing  
389 oxidative damage of cochlea. 6:19329.
- 390 Hu BH, Henderson D, research TMNJH. 2002. F-actin cleavage in apoptotic outer hair cells in chinchilla cochleas  
391 exposed to intense noise. 172(1-2):1-9.
- 392 Jamesdaniel S, Hu B, Kermany MH, Jiang H, Ding D, Coling D, proteomics RSJJo. 2011. Noise induced changes in  
393 the expression of p38/mapk signaling proteins in the sensory epithelium of the inner ear.  
394 75(2):410-424.

- 395 Kim H-J, Kim HJ, Kim M-K, Bae MK, Sung HY, Ahn J-H, Kim YH, Kim SC, Biochemical WJJ, communications br.  
396 2019. Spsb1 enhances ovarian cancer cell survival by destabilizing p21. 510(3):364-369.
- 397 Kozel PJ, Davis RR, Krieg EF, Shull GE, research LCEJH. 2002. Deficiency in plasma membrane calcium atpase  
398 isoform 2 increases susceptibility to noise-induced hearing loss in mice. 164(1-2):231-239.
- 399 Lang H, Schulte BA, Zhou D, Smythe N, Spicer SS, Neuroscience RASJTJontojotSf. 2006. Nuclear factor kappa b  
400 deficiency is associated with auditory nerve degeneration and increased noise-induced hearing loss.  
401 26(13):3541-3550.
- 402 Lavinsky J, Crow AL, Pan C, Wang J, Aaron KA, Ho MK, Li Q, Salehide P, Myint A, Monges-Hernandez M et al. 2015.  
403 Genome-wide association study identifies nox3 as a critical gene for susceptibility to noise-induced  
404 hearing loss. 11(4):e1005094.
- 405 Le TN, Straatman LV, Lea J, head BWJJoo-, cervico-faciale nsLJdo-r-ledc. 2017. Current insights in noise-induced  
406 hearing loss: A literature review of the underlying mechanism, pathophysiology, asymmetry, and  
407 management options. 46(1):41.
- 408 Liu J, Lv L, Gong J, Tan Y, Zhu Y, Dai Y, Pan X, Huen MSY, Li B, Tsao SW et al. 2018. Overexpression of f-box only  
409 protein 31 predicts poor prognosis and deregulates p38 $\alpha$ - and jnk-mediated apoptosis in esophageal  
410 squamous cell carcinoma. 142(1):145-155.
- 411 Liu SY, Song WQ, Xin JR, Li Z, Lei S, Chen YQ, Zhao TY, Wang HY, Xu LW, Zhang MB et al. 2021. Nrn1 and cat gene  
412 polymorphisms, complex noise, and lifestyles interactively affect the risk of noise-induced hearing loss.  
413 34(9):705-718.
- 414 Manne RK, Agrawal Y, Malonia SK, Banday S, Edachery S, Patel A, Kumar A, Shetty P, chemistry MKSJtJob. 2021.  
415 Fbxl20 promotes breast cancer malignancy by inhibiting apoptosis through degradation of puma and  
416 bax. 297(4):101253.
- 417 Mao H, plasticity YCJN. 2021. Noise-induced hearing loss: Updates on molecular targets and potential  
418 interventions. 2021:4784385.
- 419 Marioni JC, Mason CE, Mane SM, Stephens M, research YGJG. 2008. Rna-seq: An assessment of technical  
420 reproducibility and comparison with gene expression arrays. 18(9):1509-1517.
- 421 McGrath J, Roy P, cell BJPJSi, biology d. 2017. Stereocilia morphogenesis and maintenance through regulation  
422 of actin stability. 65:88-95.
- 423 Miao L, Ji J, Wan L, Zhang J, Yin L, science YPJE, international pr. 2019. An overview of research trends and  
424 genetic polymorphisms for noise-induced hearing loss from 2009 to 2018. 26(34):34754-34774.
- 425 Miao L, Zhang J, Yin L, research YPJJoe, health p. 2021. Tmt-based quantitative proteomics reveals cochlear  
426 protein profile alterations in mice with noise-induced hearing loss. 19(1).
- 427 Ohlemiller KK, McFadden SL, Ding DL, Flood DG, Reaume AG, Hoffman EK, Scott RW, Wright JS, Putcha GV,  
428 Audiology RJSJ et al. 1999. Targeted deletion of the cytosolic cu/zn-superoxide dismutase gene (sod1)  
429 increases susceptibility to noise-induced hearing loss. 4(5):237-246.
- 430 Ohlemiller KK, McFadden SL, Ding DL, Lear PM, JARO YSHJotAfRiO. 2000. Targeted mutation of the gene for  
431 cellular glutathione peroxidase (gpx1) increases noise-induced hearing loss in mice. 1(3):243-254.
- 432 oto-laryngologica HSLJA. 1992. Influence of genotype and age on acute acoustic trauma and recovery in cba/ca  
433 and c57bl/6j mice. 112(6):956-967.
- 434 Partearroyo T, Murillo-Cuesta S, Vallecillo N, Bermúdez-Muñoz JM, Rosa LR-dl, Mandruzzato G, Celaya AM,  
435 Zeisel SH, Pajares MA, Varela-Moreiras G et al. 2019. Betaine-homocysteine s-methyltransferase  
436 deficiency causes increased susceptibility to noise-induced hearing loss associated with plasma  
437 hyperhomocysteinemia. 33(5):5942-5956.

- 
- 438 pathology XSJTAjo. 2009. Cochlear pericyte responses to acoustic trauma and the involvement of  
439 hypoxia-inducible factor-1alpha and vascular endothelial growth factor. 174(5):1692-1704.
- 440 Qin Y, discovery SSMJC. 2014. Spsb1 may have met its match during breast cancer recurrence. 4(7):760-761.
- 441 Raphael Y, neurology RAAJE. 1992. Early microfilament reorganization in injured auditory epithelia.  
442 115(1):32-36.
- 443 Schick B, Praetorius M, Eigenthaler M, Jung V, Müller M, Walter U, Cell MKJ, research t. 2004. Increased noise  
444 sensitivity and altered inner ear mena distribution in vasp-/- mice. 318(3):493-502.
- 445 Shone G, Altschuler RA, Miller JM, research ALNJH. 1991. The effect of noise exposure on the aging ear.  
446 56(1-2):173-178.
- 447 Sliwinska-Kowalska M, research MPJM. 2013. Contribution of genetic factors to noise-induced hearing loss: A  
448 human studies review. 752(1):61-65.
- 449 Tabuchi K, Suzuki M, Mizuno A, letters AHJN. 2005. Hearing impairment in trpv4 knockout mice.  
450 382(3):304-308.
- 451 Tahera Y, Meltser I, Johansson P, Bian Z, Stierna P, Hansson AC, research BCJJon. 2006. Nf-kappab mediated  
452 glucocorticoid response in the inner ear after acoustic trauma. 83(6):1066-1076.
- 453 Tamura A, Matsunobu T, Tamura R, Kawauchi S, Sato S, research ASJB. 2016. Photobiomodulation rescues the  
454 cochlea from noise-induced hearing loss via upregulating nuclear factor kb expression in rats.  
455 1646:467-474.
- 456 Themann CL, America EAMJTJotASo. 2019. Occupational noise exposure: A review of its effects, epidemiology,  
457 and impact with recommendations for reducing its burden. 146(5):3879.
- 458 Vljakovic SM, Ambepitiya K, Barclay M, Boison D, Housley GD, research PRTJH. 2017. Adenosine receptors  
459 regulate susceptibility to noise-induced neural injury in the mouse cochlea and hearing loss.  
460 345:43-51.
- 461 Waldhaus J, Cimerman J, Gohlke H, Ehrich M, Müller M, one HLJP. 2012. Stemness of the organ of corti relates  
462 to the epigenetic status of sox2 enhancers. 7(5):e36066.
- 463 Wang H, Xiao W, Zhou Q, Chen Y, Yang S, Sheng J, Yin Y, Fan J, research JZJC. 2009a. Bystin-like protein is  
464 upregulated in hepatocellular carcinoma and required for nucleogenesis in cancer cell proliferation.  
465 19(10):1150-1164.
- 466 Wang Z, Gerstein M, Genetics MSJNr. 2009b. Rna-seq: A revolutionary tool for transcriptomics. 10(1):57-63.
- 467 Yan D, Zhu Y, Walsh T, Xie D, Yuan H, Sirmaci A, Fujikawa T, Wong ACY, Loh TL, Du L et al. 2013. Mutation of the  
468 atp-gated p2x(2) receptor leads to progressive hearing loss and increased susceptibility to noise.  
469 110(6):2228-2233.
- 470 Yao Q, Wang H, Chen H, Li Z, Jiang Y, Li Z, Wang J, Xing Y, Liu F, Yu D et al. 2022. Essential role of sptan1 in  
471 cochlear hair cell morphology and function via focal adhesion signaling. 59(1):386-404.
- 472 Zhang G, Zheng H, Pyykko I, research JZJH. 2019a. The tlr-4/nf-kb signaling pathway activation in cochlear  
473 inflammation of rats with noise-induced hearing loss. 379:59-68.
- 474 Zhang L, Lin J, RNA KYJ. 2013. Structural and functional analysis of the u3 snorna binding protein rrp9.  
475 19(5):701-711.
- 476 Zhang S, Ding E, Yin H, Zhang H, genomics BZIJjo. 2019b. Research and discussion on the relationships between  
477 noise-induced hearing loss and atp2b2 gene polymorphism. 2019:5048943.
- 478 Zhang X, Ni Y, Liu Y, Zhang L, Zhang M, Fang X, Yang Z, Wang Q, Li H, Xia Y et al. 2019c. Screening of  
479 noise-induced hearing loss (nihl)-associated snps and the assessment of its genetic susceptibility.  
480 18(1):30.

481 Zhou J, Shi Z, Zhou L, Hu Y, open MZJB. 2020. Occupational noise-induced hearing loss in china: A systematic  
482 review and meta-analysis. 10(9):e039576.

483 Zhou X-X, Chen S, Xie L, Ji Y-Z, Wu X, Wang W-W, Yang Q, Yu J-T, Sun Y, Lin X et al. 2016. Reduced connexin26 in  
484 the mature cochlea increases susceptibility to noise-induced hearing loss in mice. 17(3):301.

485

486 **Figure Captions**

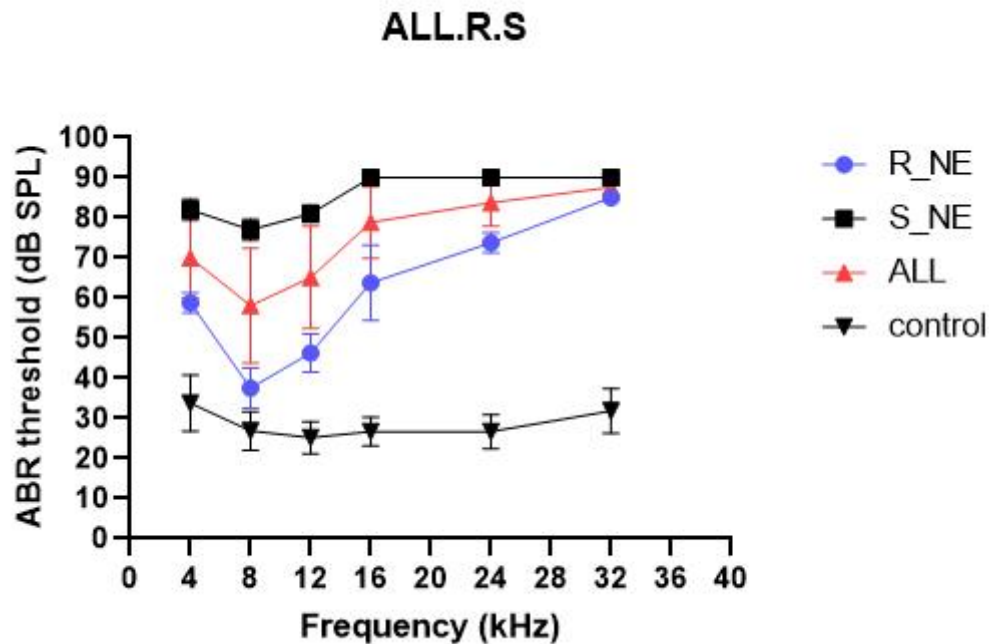

487

488 Figure 1. Determination of auditory brainstem response threshold in the three groups of mice

489 The R\_NE is the noise-resistant group, the S\_NE is the noise-sensitive group, the NE is the

490 experimental group, and the control is the control group without noise.

491

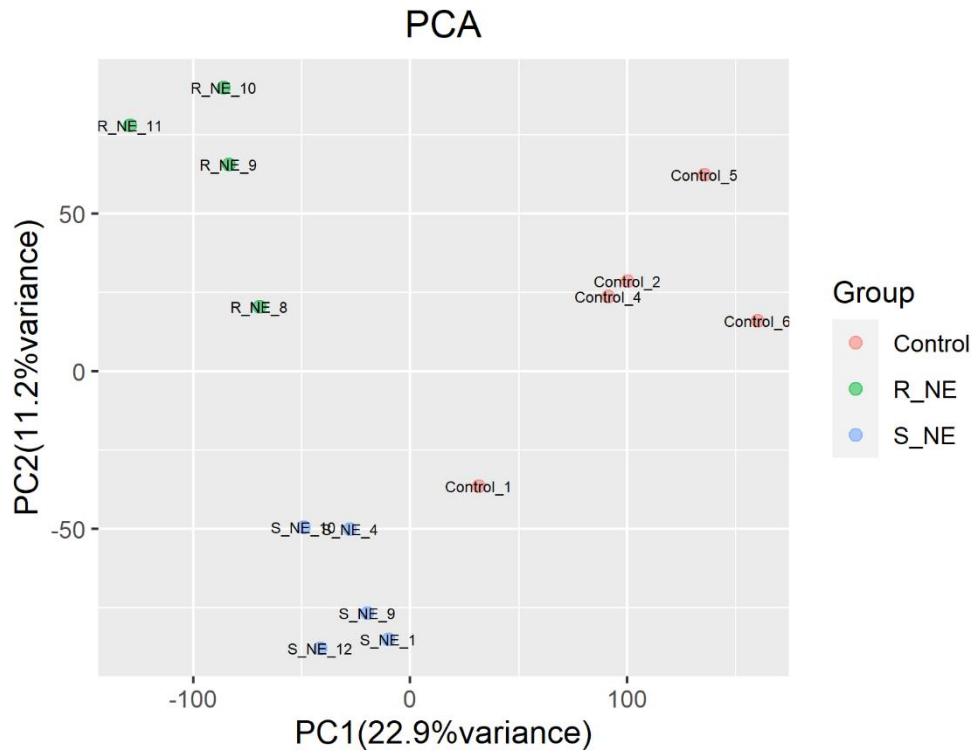

492

493 Figure 2. Principal component analysis

494 Red dots are the Control, green dots are the R\_NE, and blue dots are the S\_NE. The three

495 groups of samples are clustered into three parts, which indicates that there are significant

496 differences in gene expression in the cochlear samples.

497

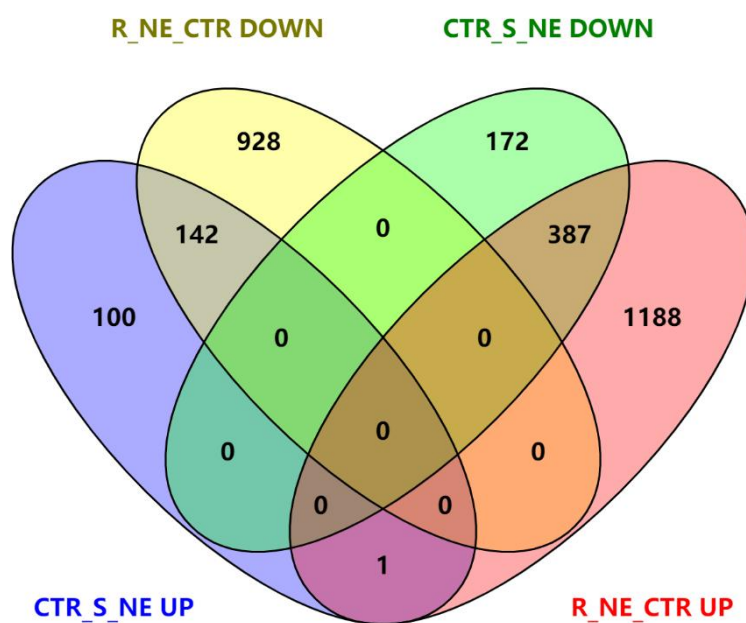

498

499 Figure 3. Wayne diagram

500

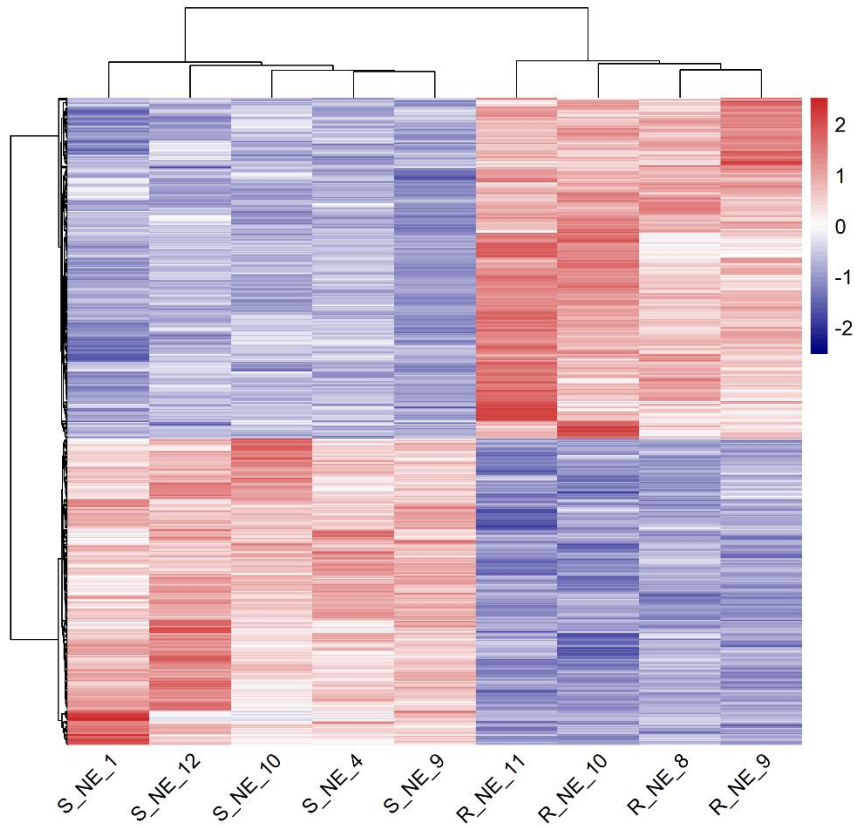

501

502 Figure 4. Heat map of differential genes in the R\_NE and the S\_NE. The red color represents

503 high correlation, and the blue color represents low correlation. It can be seen in the figure that

504 there are significant differences in differential genes between the R\_NE and the S\_NE.

505

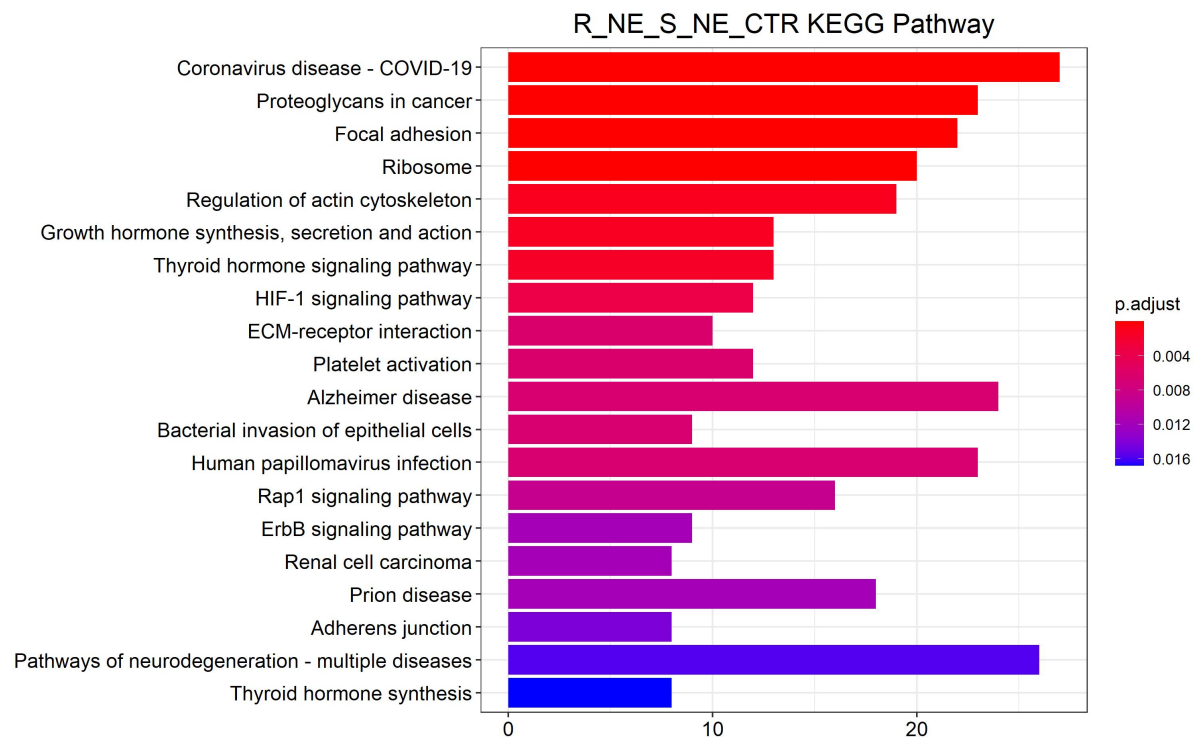

506

507 Figure 5. Enrichment analysis of common differential genes in the Control, the R\_NE, and

508 the S\_NE

509

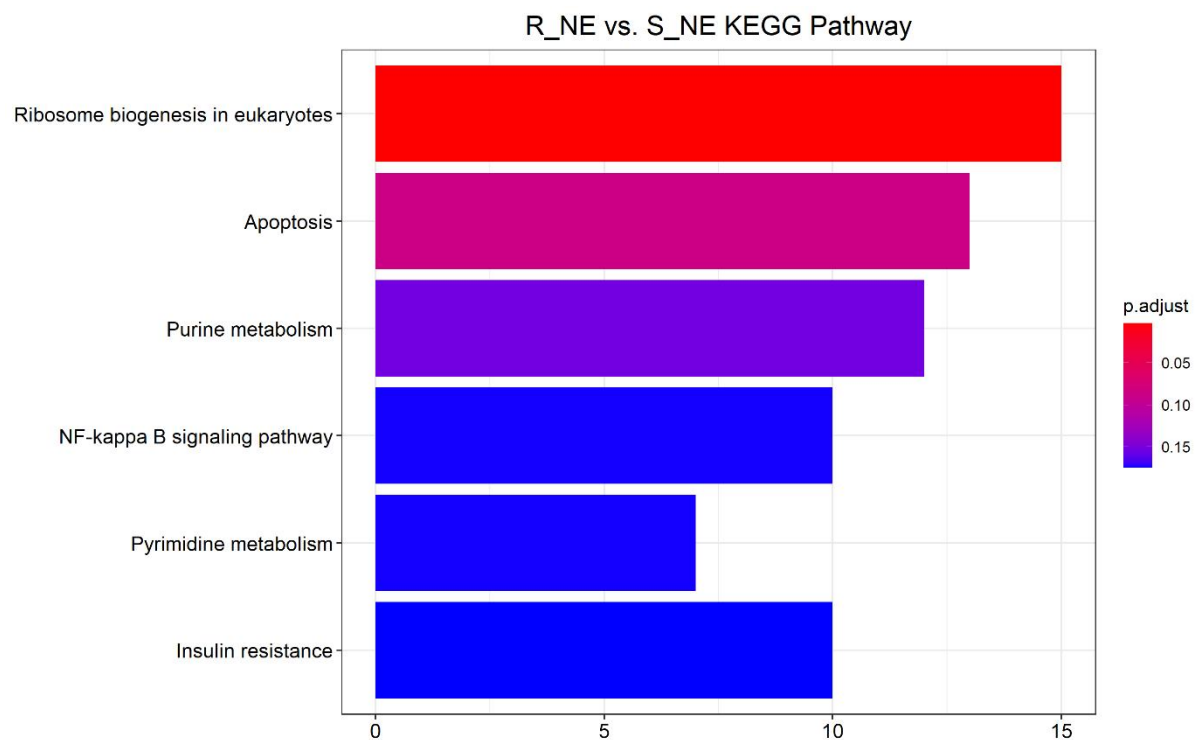

510

511 Figure 6. Enrichment analysis of differential genes in the R\_NE and the S\_NE



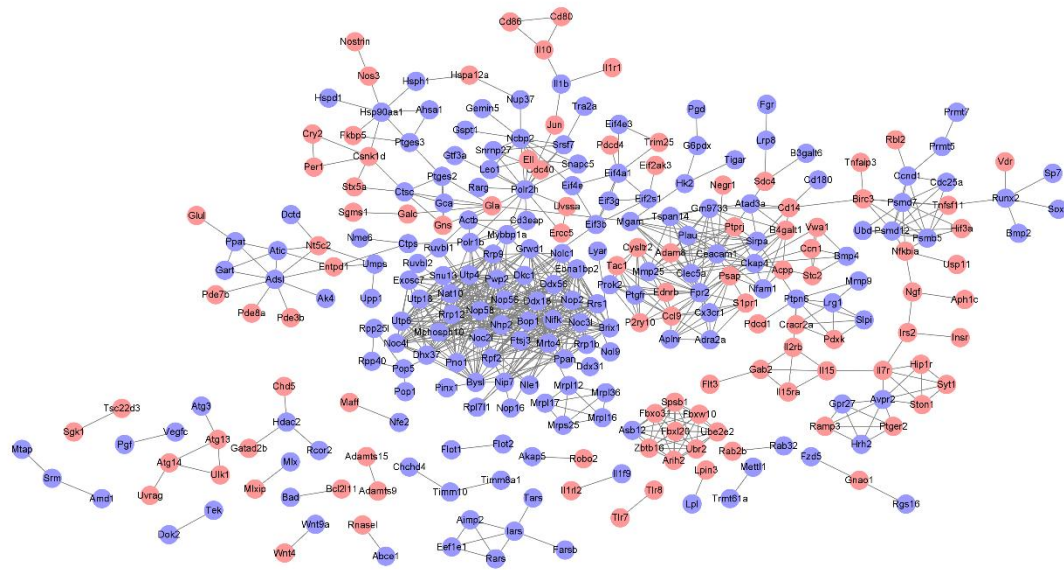

512

513 Figure 7. Protein-protein interaction network maps of differential genes in the R\_NE and the

514 S\_NE

515 Blue represents genes down-regulated in the R\_NE, and red represents genes up-regulated in

516 the S\_NE.

517

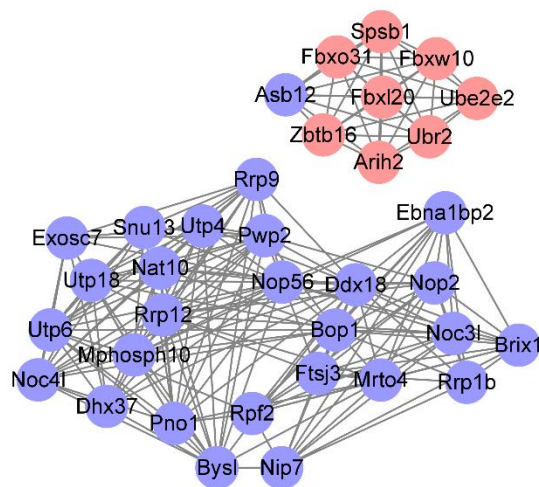

518

519 Figure 8. Protein-protein interaction network maps

520 The analysis was performed using the MCODE plugin of Cytoscape, and the top two  
521 subnetworks were selected from the resulting subnetworks (upper graph). Blue represents  
522 genes down-regulated in noise resistance, and red represents genes up-regulated in noise  
523 resistance.
